# Supplementary material for: Rumi and Pasteurized Kareish Cheeses Are a Source of β-Lactam-Resistant Salmonella in the Nile Delta Region of Egypt: Insights into Their Incidence, AMR Pattern, Genotypic Determinants of Virulence and β-Lactam Resistance
Source: MDPI journal article supplement (doi:10.3390/antibiotics13050454), 2024-05-16
Supplement: s1 [file s1]

Supplementary Material

# Rumi and Pasteurized Kareish Cheeses Are a source of $\beta$ -Lactam-Resistant *Salmonella* in the Nile Delta Region of Egypt: Insights into Their Incidence, AMR Pattern, Genotypic Determinants of Virulence and $\beta$ -Lactam Resistance

Fatma Elzhraa <sup>1,2</sup>, Maha Al-Ashmawy <sup>1</sup>, Mohammed El-Sherbini <sup>1</sup>, Ahmed M. El-Sebaey <sup>3</sup>, Csilla Mohácsi-Farkas <sup>2,\*</sup>, Gabriella Kiskó <sup>2</sup> and Ágnes Belák <sup>2</sup>

<sup>1</sup> Department of Food Hygiene and Control, Faculty of Veterinary Medicine, Mansoura University, Mansoura 35516, Egypt; dr.fatmaelzhraa@mans.edu.eg (F.E.); mahaalashmawy@mans.edu.eg (M.A.-A.); elsh@mans.edu.eg (M.E.-S.)

<sup>2</sup> Department of Food Microbiology, Hygiene and Safety, Institute of Food Science and Technology, Hungarian University of Agriculture and Life Sciences, Somlói út 14-16, H-1118 Budapest, Hungary; kisko.gabriella@uni-mate.hu (G.K.); belak.agnes@uni-mate.hu (Á.B.)

<sup>3</sup> Department of Clinical Pathology, Faculty of Veterinary Medicine, Mansoura University, Mansoura 35516, Egypt; dr\_sebaey@mans.edu.eg

\* Correspondence: mohacsine.farkas.csilla@uni-mate.hu; Tel.: +36-1-305-7202

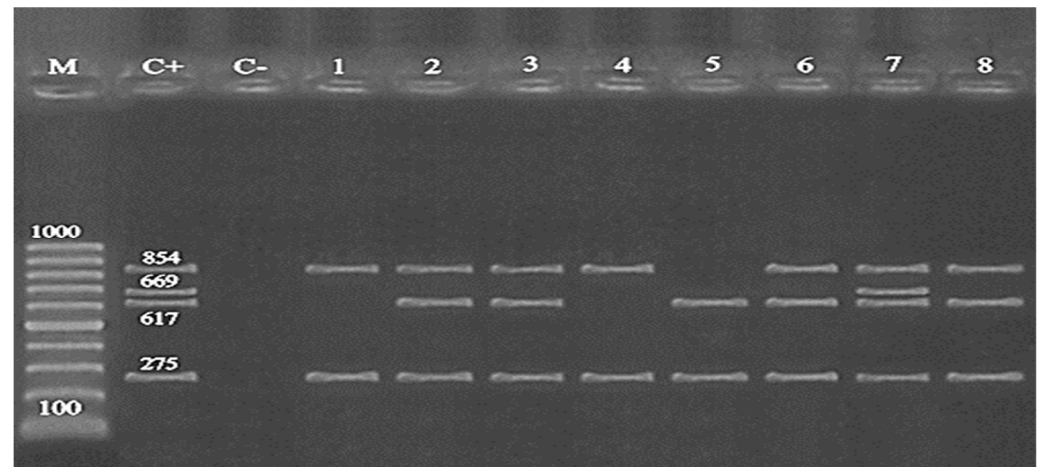

**Figure S1.** A representative gel photo showing the results of M-PCR amplified *invA* (275 bp), *stn* (617 bp), *spvC* (669 bp), and *hilA* (854 bp) virulence genes of *Salmonella* strains (n=44). Lanes: M; DNA ladder (100 bp). C+; positive control, C-; no template control, 1; *S. Anatum*, 2; *S. Enteritidis*, 3; *S. Infantis*, 4; *S. Rissen*, 5; *S. Shubra*, 6; *S. Tsevie*, 7; *S. Typhimurium*, 8; *S. Virchow*.

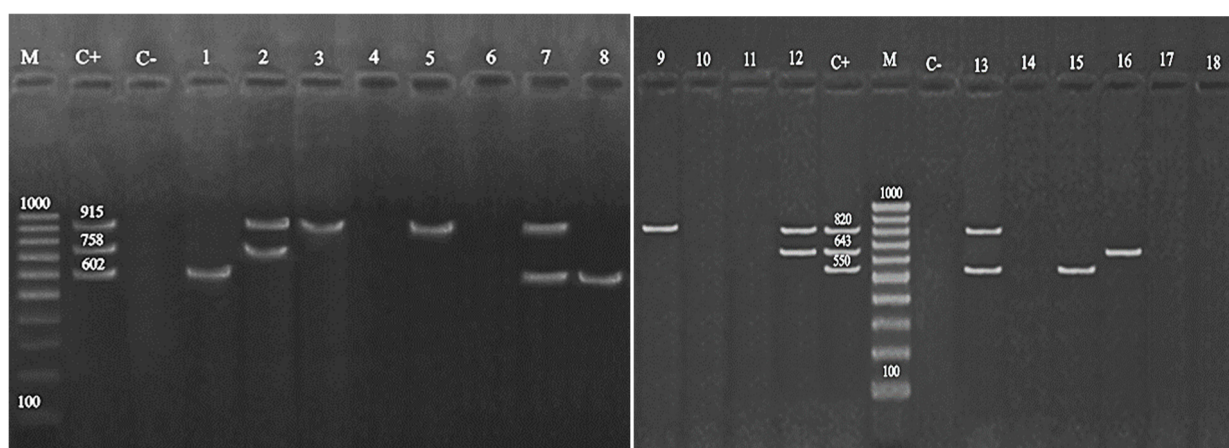

**Figure S2.** Representative gel images showing the M-PCR amplified *bla<sub>CMY-1</sub>* (915 bp), *bla<sub>CMY-2</sub>* (758 bp), *bla<sub>OXA-2</sub>* (602 bp), *bla<sub>OXA-1</sub>* (820 bp), *bla<sub>TEM-1</sub>* (643 bp) and *bla<sub>CTX-M</sub>* (550bp)  $\beta$ -lactams resistance genes of *Salmonella* strains (n=44). Lanes: M; DNA ladder (100 bp), C+; positive control, C-; no template control, 1,10; *S. Shubra*, 2,12; *S. Enteritidis*, 3,9; *S. Virchow*, 4,11; *S. Tsevie*, 5,14,15; *S. Infantis*, 6,17; *S. Rissen*, 7,13,16; *S. Typhimurium*, 8,18; *S. Anatum*.

**Table S1.** The susceptibility degree of *Salmonella* isolates (n=44) to the tested antibiotics.

| Classification  | Antibiotics | Sensitive (%) | Intermediate (%) | Resistance (%) |
|-----------------|-------------|---------------|------------------|----------------|
| Penicillins     | AMP         | 0/44 (0.0)    | 13/44 (29.55)    | 31/44 (70.45)  |
|                 | AMX         | 0/44 (0.0)    | 13/44 (29.55)    | 31/44 (70.45)  |
|                 | AMC         | 4/44 (9.09)   | 10/44 (22.73)    | 30/44 (68.18)  |
|                 | CAZ         | 6/44 (13.64)  | 3/44 (6.82)      | 35/44 (79.55)  |
| Cephalosporins  | CEP         | 4/44 (9.09)   | 3/44 (6.82)      | 37/44 (84.09)  |
|                 | CEF         | 4/44 (9.09)   | 4/44 (9.09)      | 36/44 (81.82)  |
|                 | CTZ         | 5/44 (11.36)  | 2/44 (4.55)      | 37/44 (84.09)  |
|                 | CFP         | 9/44 (20.45)  | 3/44 (6.82)      | 32/44 (72.73)  |
| Carbapenems     | IPM         | 19/44 (43.18) | 14/44 (31.82)    | 11/44 (25)     |
|                 | MPM         | 18/44 (40.91) | 24/44 (54.55)    | 2/44 (4.55)    |
| Monobactams     | ATM         | 16/44 (36.36) | 11/44 (25.0)     | 17/44 (38.64)  |
| Glycopeptides   | VAN         | 15/44 (34.09) | 18/44 (40.91)    | 11/44 (25)     |
|                 | GM          | 0/44 (0.00)   | 32/44 (72.73)    | 12/44 (27.27)  |
| Aminoglycosides | AMI         | 15/44 (34.09) | 19/44 (43.18)    | 10/44 (22.73)  |
|                 | NEO         | 16/44 (36.36) | 19/44 (43.18)    | 9/44 (20.45)   |
| Tetracyclines   | TET         | 4/44 (9.09)   | 5/44 (11.36)     | 35/44 (79.55)  |
| Macrolides      | ERY         | 0/44 (0)      | 4/44 (9.09)      | 40/44 (90.91)  |
| Lincosamides    | CLI         | 0/44 (0)      | 4/44 (9.09)      | 40/44 (90.91)  |
| Quinolones      | NAL         | 6/44 (13.64)  | 18/44 (40.91)    | 20/44 (45.45)  |
| Fluorquinolones | CIP         | 11/44 (25)    | 17/44 (38.64)    | 16/44 (36.36)  |
| Sulfonamides    | SMX         | 3/44 (6.82)   | 15/44 (34.09)    | 26/44 (59.09)  |
|                 | TMP-SMX     | 4/44 (9.09)   | 15/44 (34.09)    | 25/44 (56.82)  |
| Polymyxins      | COL         | 25/44 (56.82) | 11/44 (25)       | 8/44 (18.18)   |

Ampicillin: AMP; Amoxicillin: AMX; Amoxycillin-Clavulanic acid: AMC; Cefazolin: CAZ; Cephalothin: CEP; Cefoxitin: CEF; Ceftazidime: CTZ; Cefepime: CFP; Imipenem: IPM; Meropenem: MPM; Aztreonam: ATM; Vancomycin: VAN; Gentamicin: GM; Amikacin: AMI; Neomycin: NEO; Tetracycline: TET; Erythromycin: ERY; Clindamycin: CLI; Nalidixic acid: NAL; Ciprofloxacin: CIP; Sulfamethoxazole: SMX; Trimethoprim/ Sulfamethoxazole: TMP-SMX; Colistin: COL.

**Table S2.** The investigated virulence, NS-/ES-/AmpC- BLR genes, sequences (5'–3') of forward (F) and reverse (R) primer sets, and amplicon size (bp) for each primer pair.

| Factors            | Target genes               |   | The nucleotide Sequence (5' > 3') | Annealing temp. | Amplicon size (bp) | Reference |
|--------------------|----------------------------|---|-----------------------------------|-----------------|--------------------|-----------|
| Virulence          | <i>invA</i>                | F | TATCGCCACGTTCCGGCAA               | 53°C            | 275                | [1]       |
|                    |                            | R | TCGCACCGTCAAAGGAACC               |                 |                    |           |
|                    | <i>stn</i>                 | F | TTGTGTCGCTATCACTGGCAACC           | 59°C            | 617                | [2]       |
|                    |                            | R | ATTCGTAACCCGCTCTCGTCC             |                 |                    |           |
|                    | <i>spvC</i>                | F | CGGAAATACCATCAAATA                | 42 °C           | 669                | [3]       |
|                    |                            | R | CCCAAACCCATACTTACTCTG             |                 |                    |           |
|                    | <i>hilA</i>                | F | CGGAAGCTTATTTGCGCCATGCTGAGGTAG    | 65°C            | 854                | [4]       |
|                    |                            | R | GCATGGATCCCCGCCGCGAGATTGTG        |                 |                    |           |
| NS β-lactamases    | <i>bla<sub>OXA-1</sub></i> | F | ATGAAAAACACAATACATATCAACTTCGC     | 62°C            | 820                | [5]       |
|                    |                            | R | GTGTGTTTAGAATGGTGATCGCATT         |                 |                    |           |
|                    | <i>bla<sub>OXA-2</sub></i> | F | ACGATAGTTGTGGCAGACGAAC            | 62°C            | 602                |           |
|                    |                            | R | ATYCTGTTTGCGGTATCRATATTC          |                 |                    |           |
| ES β-lactamases    | <i>bla<sub>TEM-1</sub></i> | F | CAG CGG TAA GAT CCT TGA GA        | 55 °C           | 643                | [6]       |
|                    |                            | R | ACT CCC CGT CGT GTA GAT AA        |                 |                    |           |
|                    | <i>bla<sub>CTX-M</sub></i> | F | GTTACAATGTGTGAGAAGCAG             | 60°C            | 550                | [7]       |
|                    |                            | R | CCGTTTCCGCTATTACAAAC              |                 |                    |           |
| AmpC β-lac-tamases | <i>bla<sub>CMY-1</sub></i> | F | GTGGTGGATGCCAGCATCC               | 60°C            | 915                | [5]       |
|                    |                            | R | GGTCGAGCCGGTCTTGTTGAA             |                 |                    |           |
|                    | <i>bla<sub>CMY-2</sub></i> | F | GCACTTAGCCACCTATACGGCAG           | 60°C            | 758                |           |
|                    |                            | R | GCTTTTCAAGAATGCGCCAGG             |                 |                    |           |

## References

- Nayak, R.; Stewart, T.; Wang, R.F.; Lin, J.; Cerniglia, C.E.; Kenney, P.B. Genetic diversity and virulence gene determinants of antibiotic-resistant *Salmonella* isolated from preharvest turkey production sources. *Int. J. Food Microbiol.* **2004**, *91*, 51–62. [https://doi.org/10.1016/S0168-1605\(03\)00330-1](https://doi.org/10.1016/S0168-1605(03)00330-1).
- Murugkar, H.V.; Rahman, H.; Dutta, P.K. Distribution of virulence genes in *Salmonella* serovars isolated from man & animals. *Indian J. Med. Res.* **2003**, *117*, 66–70.
- Swamy, S.C.; Barnhart, H.M.; Lee, M.D.; Dreesen, D.W. Virulence determinants *invA* and *spvC* in salmonellae isolated from poultry products, wastewater, and human sources. *Appl. Environ. Microbiol.* **1996**, *62*, 3768–3771. <https://doi.org/10.1128/aem.62.10.3768-3771.1996>.
- Cardona-Castro, N.; Restrepo-Pineda, E.; Correa-Ochoa, M. Detection of *hilA* gene sequences in serovars of *Salmonella enterica* subsp. *enterica*. *Mem. Inst. Oswaldo Cruz* **2002**, *97*. <https://doi.org/10.1590/S0074-02762002000800016>.
- Hasman, H.; Mevius, D.; Veldman, K.; Olesen, I.; Aarestrup, F.M. β-Lactamases among extended-spectrum β-lactamase (ESBL)-resistant *Salmonella* from poultry, poultry products and human patients in The Netherlands. *J. Antimicrob. Chemother.* **2005**, *56*, 115–121. <https://doi.org/10.1093/jac/dki190>.
- Giuriatti, J.; Stefani, L.M.; Brisola, M.C.; Crecencio, R.B.; Bitner, D.S.; Faria, G.A. *Salmonella* Heidelberg: Genetic profile of its antimicrobial resistance related to extended spectrum β-lactamases (ESBLs). *Microb. Pathog.* **2017**, *109*, 195–199. <https://doi.org/10.1016/j.micpath.2017.05.040>.
- Ramatla, T.; Mileng, K.; Ndou, R.; Mphuti, N.; Syakalima, M.; Lekota, K.E.; Thekisoe, O.M.M. Molecular detection of Integrins, Colistin and β-lactamase resistant genes in *Salmonella enterica* serovars Enteritidis and Typhimurium Isolated from chickens and rats inhabiting poultry farms. *Microorganisms* **2022**, *10*, 313. <https://doi.org/10.3390/microorganisms10020313>.
